# Supplementary material for: Omics Analysis of Chemoresistant Triple Negative Breast Cancer Cells Reveals Novel Metabolic Vulnerabilities
Source: MDPI journal article supplement (doi:10.3390/cells11172719), 2022-08-31
Supplement: s1 [file s1]

## Supplementary Materials

### Omics analysis of chemoresistant triple negative breast cancer cells reveals novel metabolic vulnerabilities

Dimitris Kordias<sup>1,2</sup>, Christina Kostara<sup>2#</sup>, Styliani Papadaki<sup>2#</sup>, John Verigos<sup>1§</sup>, Eleni Bairaktari<sup>2</sup> and Angeliki Magklara<sup>1,2,3\*</sup>

**Supplementary Figure S1. PTX-res cell line presents cross-resistance to Doxorubicin.** SUM 159 PTX-res cells treated with Doxorubicin demonstrated an increased resistance to this drug. Cell confluency was measured using the Incucyte Zoom live cell analysis system. The Doxorubicin IC<sub>50</sub> values of SUM 159 parental and SUM 159 PTX-res cells, were calculated using Graphpad Prism version 8.01. Data from three independent experiments performed in triplicate are shown. Error bars represent the SEM of biological replicates (n = 3).: \*\*\*: p < 0.001.

**Supplementary Figure S2. Bar graph showing the statistically significantly different metabolites quantified from SUM159 parental and PTX-res cells.** Extraction of metabolites using a two-phase process and metabolite quantification using the Chenomx software were conducted. Arginine, creatine phosphate, myo-inositol and phosphocholine were significantly different between the two cell lines. Error bars indicate the SEM of biological replicates (n = 6).

**Supplementary Figure S3. Metabolite enrichment analysis using MetaboAnalyst.** **A.** Quantitative enrichment analysis overview of the enriched metabolite sets derived from the quantified metabolites of parental and PTX-res cells based on the SMPDB library. The dashed line represents the cut-off for the significantly enriched metabolite sets in the PTX-res cells (p<0.05 and FDR<0.1). **B.** Table that summarizes the pathways that were found enriched in the PTX-res cells. Match status indicates the number of metabolites found in our data vs. the number of metabolites in the library related to a specific pathway. M; metabolism, B; biosynthesis

**Supplementary Figure S4. Typical <sup>1</sup>H NMR 500 MHz spectra of lipid extracts from SUM159 PTX-res cells and SUM159 parental cells.** The spectral region containing the signal attributed to residual water was excluded. Lipids presented in relatively higher levels in cells' membrane deflect upwards (↑ for PTX-res and ↑ for parental) and in relatively lower levels downwards (↓ for PTX-res and ↓ for parental). Abbreviations: CE, Cholesterol esters; DAGPLs, Diacylglycerophospholipids; DHA,

Docosahexaenoic acid; **EPA+AA**, The sum of Eicosapentaenoic + Arachidonic Acid; **Ether GPLs**, Ether Glycerolipids; **FA**, Fatty Acids; **FC**, Free Cholesterol; **LA**, Linoleic acid; **LysoPC**, Lysophosphatidylcholine; **MeOD**, Deuterated Methanol solvent; **PL**, Phospholipids; **PC**, Phosphatidylcholine; **PE**, Phosphatidylethanolamine; **PUFA**, Polyunsaturated fatty acids; **SFA**, Saturated fatty acids; **SLs**, Sphingolipids; **SM**, Sphingomyelin; **TC**, Total Cholesterol; **TG**, Triglycerides; **UFA**. Unsaturated fatty acids \*: Unknown.

**Supplementary Figure S5. Schematic representation of the cholesterol biosynthesis pathway.** The two arms of cholesterol biosynthesis pathway (Bloch and Kandutsch-Russell) are presented. Red shapes represent the metabolites of cholesterol biosynthesis pathway. Dashed arrows indicate multiple steps for metabolite production, while the enzymes catalyzing the steps are also presented. *MSMO1* is shown in blue.

**Table S1. The 3,184 differentially expressed genes (DEGs) between SUM159 parental and PTX resistant cells identified by RNA-sequencing.** The transcriptomes of parental and resistant cells were compared using the R package DESEQ2 and DEGs were identified by setting a 2-fold-change and a  $p\text{-adj} \leq 0.01$  as cut-off values.

Figure S1.

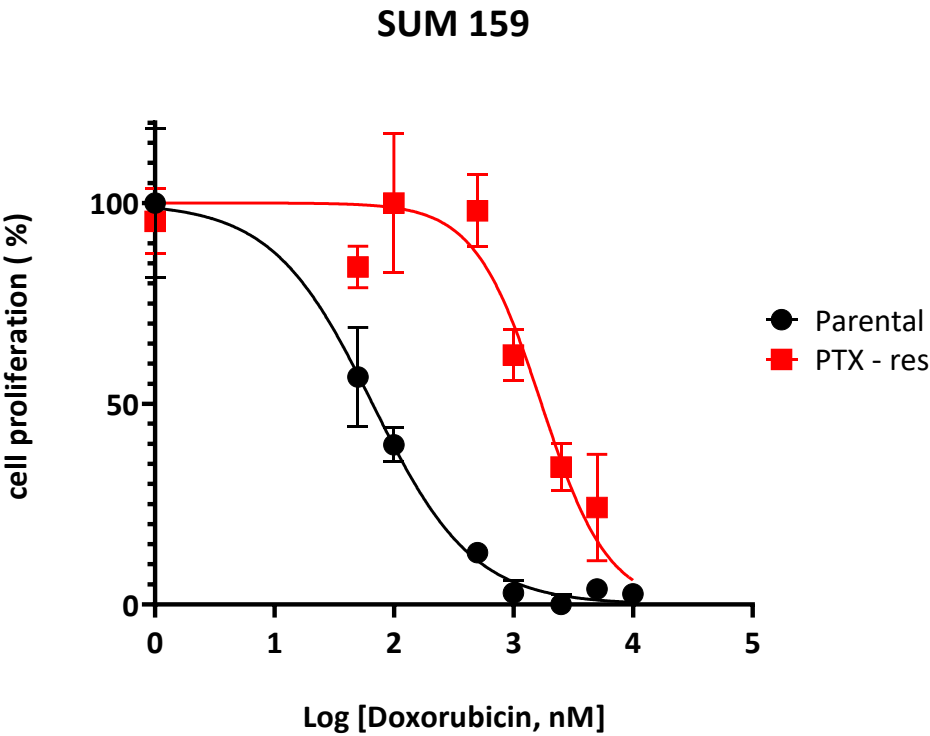

| IC <sub>50</sub> ( nM ) | Parental |        | PTX Resistant |        | p < 0.001 |
|-------------------------|----------|--------|---------------|--------|-----------|
|                         | 66.06    | ± 7.78 | 1711          | ±37.12 |           |

Figure S2.

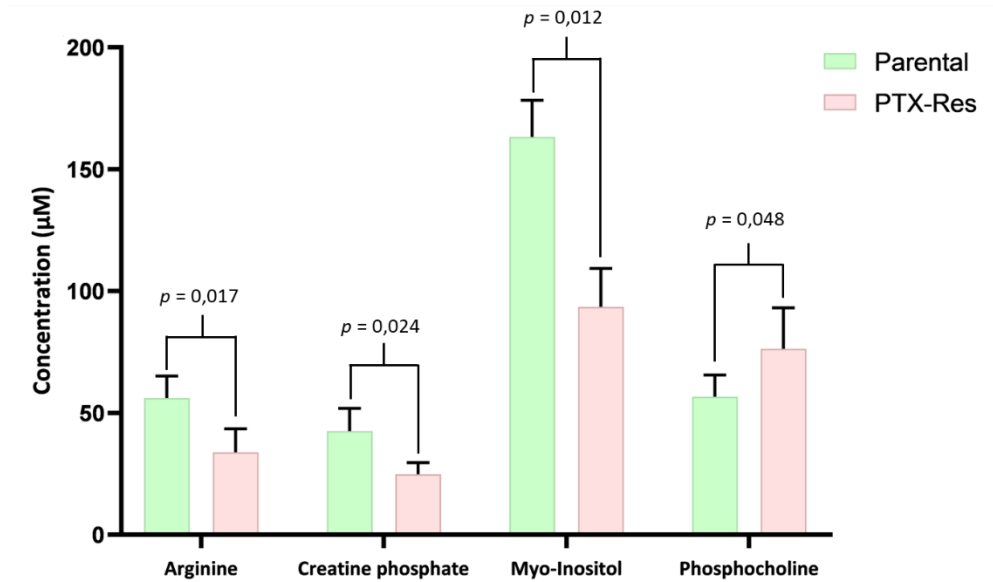

Figure S3.

A

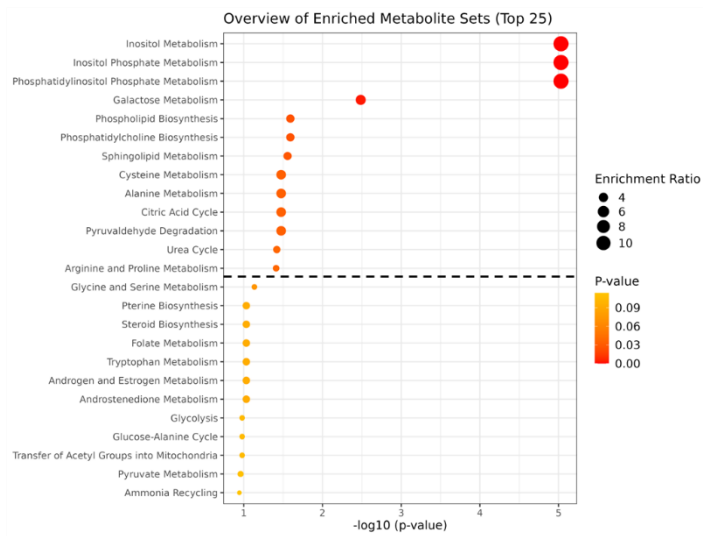

B

| Pathway                               | Match Status | p       |
|---------------------------------------|--------------|---------|
| Inositol M                            | <u>1/33</u>  | 6.33E-6 |
| Inositol phosphate M                  | <u>1/26</u>  | 9.33E-6 |
| Phosphatidylinositol signaling system | <u>1/17</u>  | 9.33E-6 |
| Galactose M                           | <u>3/38</u>  | 0.003   |
| Phospholipid B                        | <u>2/29</u>  | 0.026   |
| Phosphatidylcholine B                 | <u>2/14</u>  | 0.026   |
| Sphingolipid M                        | <u>2/40</u>  | 0.028   |
| Cysteine M                            | <u>1/26</u>  | 0.034   |
| Alanine M                             | <u>1/17</u>  | 0.034   |
| Citric acid cycle                     | <u>1/32</u>  | 0.034   |
| Pyruvaldehyde Degradation             | <u>1/10</u>  | 0.034   |
| Urea Cycle                            | <u>3/29</u>  | 0.038   |
| Arginine and Proline M                | <u>4/53</u>  | 0.039   |

Figure S4.

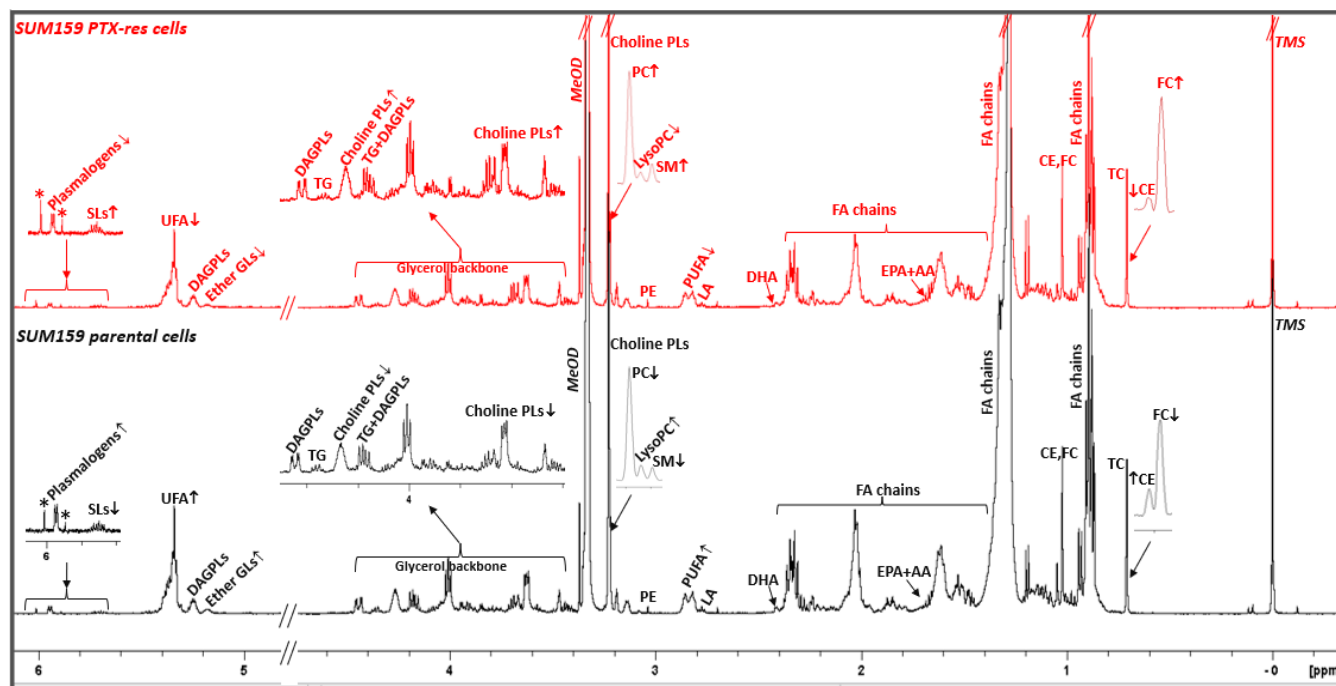

Figure S5.

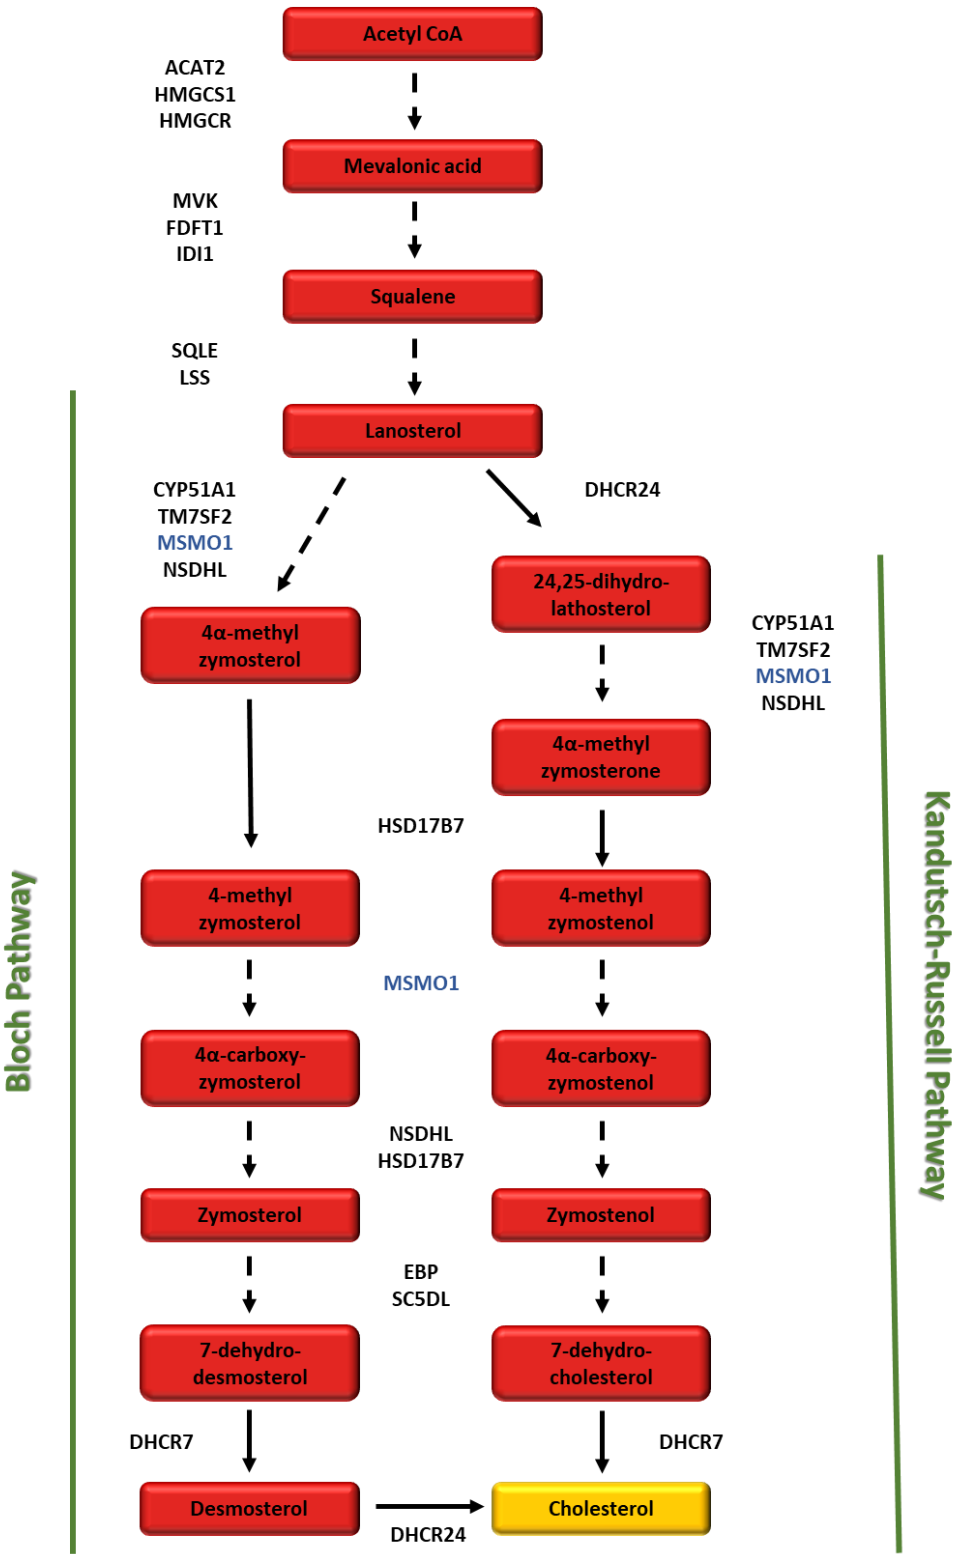

## Tables

**Table S1.** See the excel file entitled “**Suppl. Table S1**”
